# Supplementary material
Source: MDPI journal article supplement (https://www.mdpi.com/1424-8247/16/4/524)
Supplement: s1 [file s1]

**Table S1.** Biodistribution of [ $^{18}\text{F}$ ]Favipiravir in mice (%ID/g).

|                 | 5 min |      |   | 15 min |      |   | 30 min |      |   | 60 min |      |   |
|-----------------|-------|------|---|--------|------|---|--------|------|---|--------|------|---|
|                 | Mean  | SD   | N | Mean   | SD   | N | Mean   | SD   | N | Mean   | SD   | N |
| Brain           | 2.33  | 0.07 | 4 | 2.71   | 0.18 | 4 | 2.67   | 0.10 | 4 | 1.84   | 0.17 | 4 |
| Blood           | 9.53  | 0.27 | 4 | 8.14   | 0.54 | 4 | 7.27   | 0.37 | 4 | 4.83   | 0.23 | 4 |
| Muscle          | 4.67  | 0.22 | 4 | 4.26   | 0.03 | 4 | 3.64   | 0.16 | 4 | 2.49   | 0.24 | 4 |
| Spleen          | 5.23  | 0.19 | 4 | 4.54   | 0.18 | 4 | 3.84   | 0.37 | 4 | 2.66   | 0.14 | 4 |
| Heart           | 5.55  | 0.33 | 4 | 4.82   | 0.26 | 4 | 3.89   | 0.40 | 4 | 2.57   | 0.25 | 4 |
| Lung            | 7.85  | 0.32 | 4 | 6.92   | 0.49 | 4 | 6.28   | 0.40 | 4 | 3.86   | 0.37 | 4 |
| Pancreas        | 4.85  | 0.21 | 4 | 4.59   | 0.37 | 4 | 4.14   | 0.17 | 4 | 2.93   | 0.23 | 4 |
| Stomach         | 1.04  | 0.35 | 4 | 1.06   | 0.42 | 4 | 1.38   | 0.48 | 4 | 0.97   | 0.18 | 4 |
| Small Intestine | 5.61  | 0.75 | 4 | 5.29   | 0.62 | 4 | 5.46   | 0.20 | 4 | 4.30   | 1.02 | 4 |
| Kidney          | 7.60  | 0.43 | 4 | 7.74   | 0.89 | 4 | 6.97   | 0.77 | 4 | 5.18   | 0.47 | 4 |
| Liver           | 7.46  | 0.61 | 4 | 6.66   | 0.44 | 4 | 6.27   | 0.39 | 4 | 4.43   | 0.61 | 4 |
| Bone            | 6.10  | 0.97 | 4 | 6.27   | 1.24 | 4 | 6.00   | 0.68 | 4 | 6.05   | 1.22 | 4 |

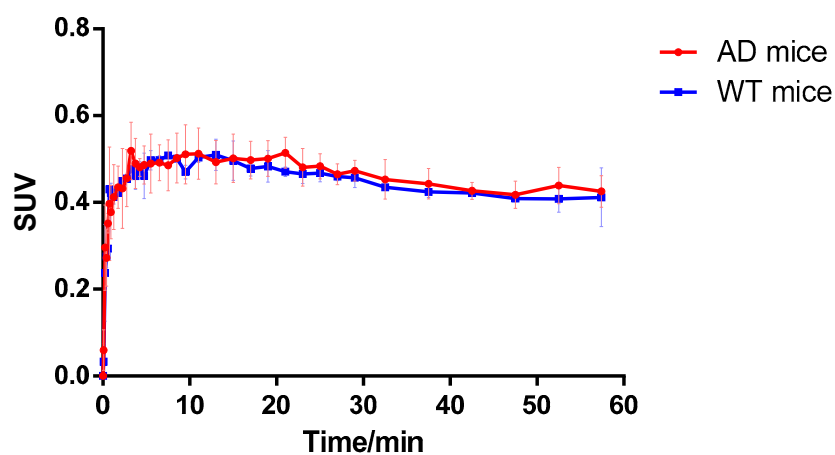

**Figure S1.** TACs of [ $^{18}\text{F}$ ]Favipiravir in AD mice and WT mouse brains ( $n = 3$ ).

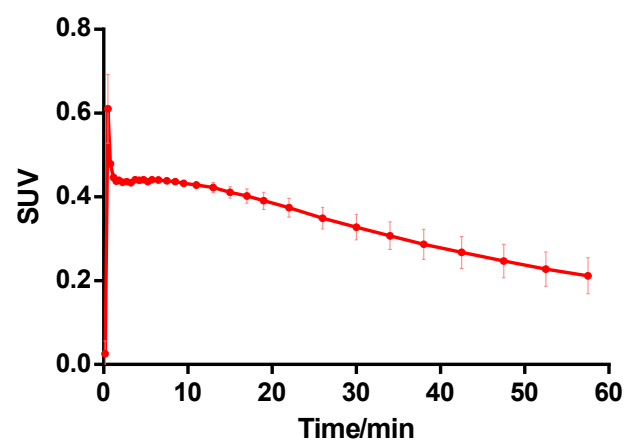

Figure S2. TACs of [ $^{18}\text{F}$ ]Favipiravir in NHP brains ( $n = 2$ ).

a

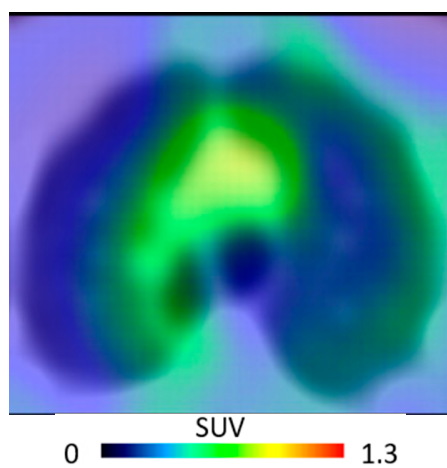

b.

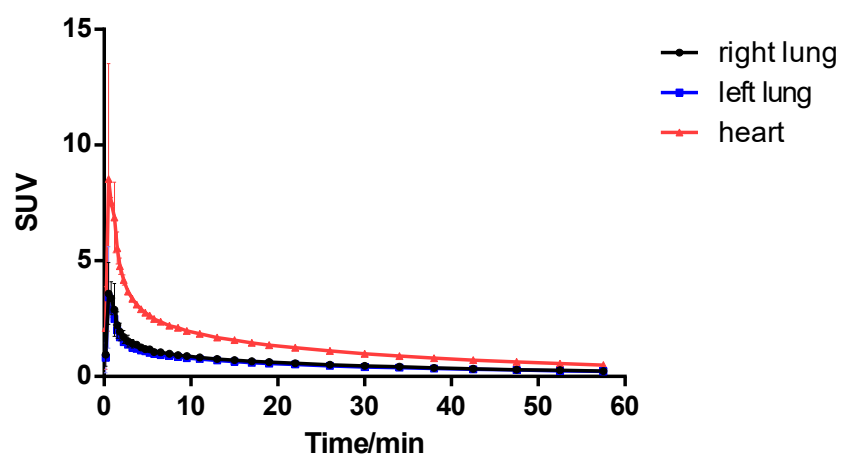

c.

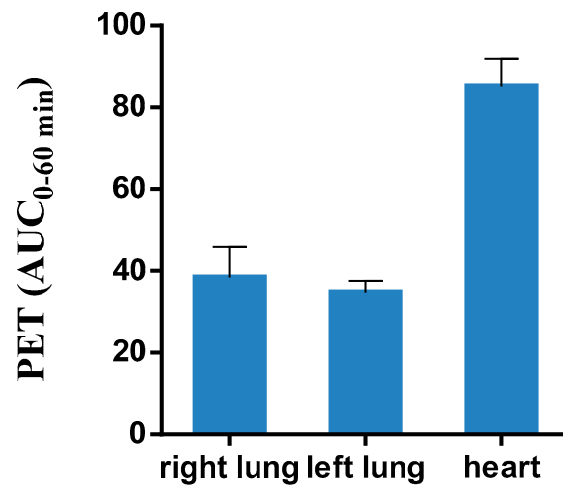

**Figure S3.** PET imaging of NHP with [ $^{18}\text{F}$ ]Favipiravir. (a) Representative summed PET image (0-60 min) of NHP lungs and heart with [ $^{18}\text{F}$ ]Favipiravir ( $n = 2$ ); (b) TACs (0-60 min) of [ $^{18}\text{F}$ ]Favipiravir in the NHP lungs and heart ( $n = 2$ ); (c) AUCs (0-60 min) of [ $^{18}\text{F}$ ]Favipiravir in the NHP lungs and heart ( $n = 2$ ).

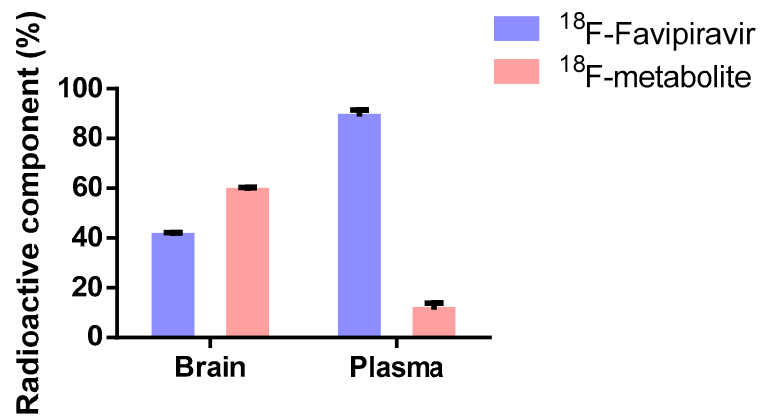

**Figure S4.** Metabolic analysis of [ $^{18}\text{F}$ ]Favipiravir in mouse brain and plasma at 30 min after [ $^{18}\text{F}$ ]Favipiravir administration ( $n = 2$ ).
